# Supplementary material for: Viper’s bugloss (Echium spp.) honey typing and establishing the pollen threshold for monofloral honey
Source: PubMed Central journal article supplement (PMC5627913; doi:10.1371/journal.pone.0185405), 2017-10-04
Supplement: pone.0185405.s001.pdf [file pone.0185405.s001.pdf]

S1 Table. Means and standard deviations of the groupings of the data of 5%

|        | Echium type | Free acidity | pH        | Moisture   | Turbidity | electrical conductivity | Pfund       |
|--------|-------------|--------------|-----------|------------|-----------|-------------------------|-------------|
| 30-35  | 32,87±1,12  | 28,72±6,84   | 4,09±0,35 | 16,11±1,22 | 0,13±0,04 | 0,41±0,2                | 52,84±20,76 |
| 35-40  | 36,77±1,18  | 37,06±14,65  | 4,17±0,22 | 15,95±0,91 | 0,24±0,13 | 0,53±0,25               | 69,77±26,33 |
| 40-45  | 42,99±1,48  | 40,15±11,66  | 4,46±0,13 | 15±0,58    | 0,25±0,1  | 0,75±0,21               | 85,75±20,52 |
| 45-50  | 48,13±2,01  | 31,56±8,29   | 4,26±0,45 | 15,6±0,18  | 0,21±0,09 | 0,58±0,33               | 67,25±27,34 |
| 50-55  | 52,88±1,37  | 29,43±5,41   | 4,25±0,34 | 16,16±0,99 | 0,23±0,13 | 0,53±0,23               | 69,33±22,81 |
| 55-60  | 58,12±1,54  | 41,27±13,79  | 4,32±0,39 | 15,27±0,81 | 0,23±0,06 | 0,71±0,32               | 83,9±6,93   |
| 60-65  | 62,38±1,48  | 31,34±11,88  | 4,13±0,19 | 15,54±0,76 | 0,19±0,09 | 0,49±0,25               | 62,63±22,49 |
| 65-70  | 68,05±1,23  | 32,5±7,23    | 4,22±0,20 | 15,74±1,34 | 0,23±0,04 | 0,57±0,2                | 72,03±11,16 |
| 70-75  | 73,3±2,21   | 26,25±12,6   | 4,04±0,23 | 15,6±1,00  | 0,1±0,05  | 0,38±0,27               | 47,53±23,51 |
| 75-80  | 77,95±0,74  | 29,51±6,03   | 3,84±0,14 | 16,51±1,32 | 0,12±0,08 | 0,33±0,11               | 48,77±17,23 |
| 80-85  | 82,79±1,41  | 33,27±10     | 4,05±0,36 | 14,85±3,94 | 0,19±0,08 | 0,47±0,24               | 62,17±16,83 |
| 85-90  | 87,74±1,36  | 24,58±12,56  | 3,55±1,35 | 15,51±0,70 | 0,18±0,1  | 0,36±0,25               | 52,03±23,27 |
| 90-95  | 92,04±1,48  | 27,33±6,88   | 4,02±0,61 | 16,31±1,40 | 0,22±0,12 | 0,35±0,16               | 48,84±14,82 |
| 95-100 | 96,15±0,76  | 23,01±9,29   | 3,45±1,23 | 16,19±0,73 | 0,26±0,16 | 0,23±0,1                | 43,84±16,14 |
