# Supplementary material for: Viper’s bugloss (Echium spp.) honey typing and establishing the pollen threshold for monofloral honey
Source: PubMed Central journal article supplement (PMC5627913; doi:10.1371/journal.pone.0185405), 2017-10-04
Supplement: pone.0185405.s002.pdf [file pone.0185405.s002.pdf]

| Groupings<br>3% | Echium       | Acidity free  | pH          | Moisture     | Turbidity   | Electric<br>conductivity | Pfund         |
|-----------------|--------------|---------------|-------------|--------------|-------------|--------------------------|---------------|
| 30-33           | 31,47 ± 0,60 | 30,58 ± 03,57 | 4,1 ± 0,45  | 16,15 ± 2,03 | 0,13 ± 0,03 | 0,42 ± 0,18              | 53,01 ± 12,32 |
| 33-36           | 34,17 ± 0,97 | 33,68 ± 15,95 | 4,09 ± 0,31 | 15,86 ± 0,98 | 0,19 ± 0,11 | 0,47 ± 0,29              | 61,35 ± 30,79 |
| 36-39           | 37,46 ± 0,64 | 32,85 ± 08,02 | 4,2 ± 0,18  | 16,22 ± 0,63 | 0,2 ± 0,14  | 0,5 ± 0,17               | 65,37 ± 20,43 |
| 39-42           | 41,49 ± 0,47 | 45,43 ± 03,41 | 4,46 ± 0,14 | 15,19 ± 0,59 | 0,26 ± 0,09 | 0,91 ± 0,09              | 89,85 ± 04,96 |
| 42-45           | 44,12 ± 0,51 | 36,19 ± 14,67 | 4,46 ± 0,15 | 14,86 ± 0,61 | 0,24 ± 0,12 | 0,63 ± 0,21              | 82,67 ± 28,21 |
| 45-48           | 45,98 ± 0,82 | 31,63 ± 06,89 | 4,18 ± 0,42 | 15,65 ± 0,25 | 0,23 ± 0,04 | 0,5 ± 0,39               | 67,22 ± 36,83 |
| 48-51           | 49,82 ± 0,52 | 30,57 ± 08,90 | 4,42 ± 0,50 | 15,95 ± 0,78 | 0,21 ± 0,10 | 0,61 ± 0,3               | 70,46 ± 24,18 |
| 51-54           | 52,54 ± 0,86 | 28,09 ± 05,53 | 4,18 ± 0,36 | 16,07 ± 1,13 | 0,21 ± 0,15 | 0,48 ± 0,26              | 62,11 ± 24,15 |
| 54-57           | 55,45 ± 1,07 | 34,97 ± 13,16 | 4,33 ± 0,37 | 15,61 ± 0,77 | 0,26 ± 0,06 | 0,69 ± 0,35              | 86,99 ± 06,37 |
| 57-60           | 58,89 ± 1,23 | 43,70 ± 08,55 | 4,29 ± 0,28 | 15,47 ± 0,96 | 0,24 ± 0,08 | 0,7 ± 0,12               | 82,68 ± 04,85 |
| 60-63           | 61,28 ± 0,94 | 26,02 ± 10,30 | 4,05 ± 0,21 | 15,22 ± 0,83 | 0,17 ± 0,12 | 0,38 ± 0,23              | 53,38 ± 22,84 |
| 63-66           | 63,76 ± 0,32 | 38,00 ± 11,33 | 4,24 ± 0,11 | 15,94 ± 0,50 | 0,22 ± 0,06 | 0,62 ± 0,24              | 74,21 ± 18,23 |
| 66-69           | 67,10 ± 0,48 | 31,50 ± 04,13 | 4,25 ± 0,15 | 15,76 ± 1,15 | 0,23 ± 0,02 | 0,57 ± 0,11              | 75,27 ± 03,75 |
| 69-72           | 69,67 ± 0,74 | 35,38 ± 09,69 | 4,2 ± 0,25  | 15,46 ± 1,59 | 0,2 ± 0,07  | 0,6 ± 0,27               | 68,69 ± 14,36 |
| 72-75           | 74,57 ± 0,31 | 19,38 ± 05,83 | 3,91 ± 0,01 | 16,06 ± 0,83 | 0,09 ± 0,05 | 0,23 ± 0,06              | 35,5 ± 15,38  |
| 75-78           | 77,08 ± 0,55 | 31,35 ± 05,53 | 3,82 ± 0,13 | 17,03 ± 1,36 | 0,09 ± 0,04 | 0,26 ± 0,10              | 40,85 ± 15,73 |
| 78-81           | 78,75 ± 0,98 | 27,57 ± 06,56 | 3,86 ± 0,14 | 16,47 ± 1,36 | 0,15 ± 0,10 | 0,36 ± 0,09              | 54,23 ± 16,79 |
| 81-84           | 82,62 ± 1,22 | 34,13 ± 10,31 | 3,97 ± 0,30 | 14,47 ± 4,36 | 0,18 ± 0,08 | 0,43 ± 0,18              | 58,63 ± 16,21 |
| 84-87           | 85,59 ± 0,92 | 31,15 ± 10,98 | 4,27 ± 0,43 | 15,15 ± 0,65 | 0,19 ± 0,11 | 0,59 ± 0,36              | 63,57 ± 32,01 |
| 87-90           | 88,51 ± 0,86 | 22,38 ± 12,75 | 3,29 ± 1,62 | 15,80 ± 0,68 | 0,18 ± 0,07 | 0,3 ± 0,21               | 52,1 ± 17,07  |
| 90-93           | 91,20 ± 0,87 | 27,31 ± 07,05 | 4,07 ± 0,71 | 15,89 ± 1,14 | 0,18 ± 0,10 | 0,37 ± 0,18              | 46,02 ± 16,21 |
| 93-96           | 94,34 ± 0,86 | 25,03 ± 11,07 | 3,47 ± 1,33 | 16,78 ± 1,53 | 0,26 ± 0,14 | 0,28 ± 0,11              | 48,92 ± 12,06 |
| 96-99           | 96,51 ± 0,60 | 24,16 ± 04,50 | 3,81 ± 0,20 | 16,30 ± 0,47 | 0,31 ± 0,16 | 0,23 ± 0,07              | 46,82 ± 18,71 |

| Groupings<br>5% | Echium       | Acidity free  | pH          | Moisture     | Turbidity   | Electric<br>conductivity | Pfund         |
|-----------------|--------------|---------------|-------------|--------------|-------------|--------------------------|---------------|
| 30-35           | 32,87 ± 1,12 | 28,72 ± 06,84 | 4,09 ± 0,35 | 16,11 ± 1,22 | 0,13 ± 0,04 | 0,41 ± 0,20              | 52,84 ± 20,76 |
| 35-40           | 36,77 ± 1,18 | 37,06 ± 14,65 | 4,17 ± 0,22 | 15,95 ± 0,91 | 0,24 ± 0,13 | 0,53 ± 0,25              | 69,77 ± 26,33 |
| 40-45           | 42,99 ± 1,48 | 40,15 ± 11,66 | 4,46 ± 0,13 | 15 ± 0,58    | 0,25 ± 0,10 | 0,75 ± 0,21              | 85,75 ± 20,52 |
| 45-50           | 48,13 ± 2,01 | 31,56 ± 08,29 | 4,26 ± 0,45 | 15,6 ± 0,18  | 0,21 ± 0,09 | 0,58 ± 0,33              | 67,25 ± 27,34 |
| 50-55           | 52,88 ± 1,37 | 29,43 ± 05,41 | 4,25 ± 0,34 | 16,16 ± 0,99 | 0,23 ± 0,13 | 0,53 ± 0,23              | 69,33 ± 22,81 |
| 55-60           | 58,12 ± 1,54 | 41,27 ± 13,79 | 4,32 ± 0,39 | 15,27 ± 0,81 | 0,23 ± 0,06 | 0,71 ± 0,32              | 83,9 ± 06,93  |
| 60-65           | 62,38 ± 1,48 | 31,34 ± 11,88 | 4,13 ± 0,19 | 15,54 ± 0,76 | 0,19 ± 0,09 | 0,49 ± 0,25              | 62,63 ± 22,49 |
| 65-70           | 68,05 ± 1,23 | 32,5 ± 07,23  | 4,22 ± 0,20 | 15,74 ± 1,34 | 0,23 ± 0,04 | 0,57 ± 0,20              | 72,03 ± 11,16 |
| 70-75           | 73,3 ± 2,21  | 26,25 ± 12,60 | 4,04 ± 0,23 | 15,6 ± 1,00  | 0,1 ± 0,05  | 0,38 ± 0,27              | 47,53 ± 23,51 |
| 75-80           | 77,95 ± 0,74 | 29,51 ± 06,03 | 3,84 ± 0,14 | 16,51 ± 1,32 | 0,12 ± 0,08 | 0,33 ± 0,11              | 48,77 ± 17,23 |
| 80-85           | 82,79 ± 1,41 | 33,27 ± 10,00 | 4,05 ± 0,36 | 14,85 ± 3,94 | 0,19 ± 0,08 | 0,47 ± 0,24              | 62,17 ± 16,83 |
| 85-90           | 87,74 ± 1,36 | 24,58 ± 12,56 | 3,55 ± 1,35 | 15,51 ± 0,70 | 0,18 ± 0,10 | 0,36 ± 0,25              | 52,03 ± 23,27 |
| 90-95           | 92,04 ± 1,48 | 27,33 ± 06,88 | 4,02 ± 0,61 | 16,31 ± 1,40 | 0,22 ± 0,12 | 0,35 ± 0,16              | 48,84 ± 14,82 |
| 95-100          | 96,15 ± 0,76 | 23,01 ± 09,29 | 3,45 ± 1,23 | 16,19 ± 0,73 | 0,26 ± 0,16 | 0,23 ± 0,10              | 43,84 ± 16,14 |

| Groupings<br>10% | Echium       | Acidity free  | pH          | Moisture     | Turbidity   | Electric<br>conductivity | Pfund         |
|------------------|--------------|---------------|-------------|--------------|-------------|--------------------------|---------------|
| 30-40            | 34,82 ± 2,30 | 32,89 ± 11,89 | 4,13 ± 0,29 | 16,03 ± 1,04 | 0,18 ± 0,11 | 0,47 ± 0,23              | 61,3 ± 24,59  |
| 40-50            | 45,13 ± 3,11 | 36,57 ± 10,89 | 4,38 ± 0,30 | 15,25 ± 0,54 | 0,23 ± 0,09 | 0,68 ± 0,27              | 78,04 ± 24,33 |
| 50-60            | 54,54 ± 2,85 | 33,17 ± 10,21 | 4,27 ± 0,35 | 15,88 ± 1,01 | 0,23 ± 0,11 | 0,58 ± 0,26              | 73,93 ± 20,21 |
| 60-70            | 64,86 ± 3,19 | 31,85 ± 09,82 | 4,17 ± 0,19 | 15,63 ± 1,02 | 0,21 ± 0,08 | 0,52 ± 0,23              | 66,75 ± 18,52 |
| 70-80            | 76,79 ± 2,39 | 28,69 ± 07,58 | 3,89 ± 0,18 | 16,28 ± 1,27 | 0,11 ± 0,07 | 0,34 ± 0,15              | 48,46 ± 17,79 |
| 80-90            | 84,73 ± 2,82 | 29,87 ± 11,63 | 3,85 ± 0,90 | 15,11 ± 3,08 | 0,19 ± 0,08 | 0,43 ± 0,24              | 58,2 ± 19,75  |
| 90-100           | 93,46 ± 2,36 | 25,84 ± 07,91 | 3,82 ± 0,89 | 16,27 ± 1,20 | 0,24 ± 0,13 | 0,31 ± 0,15              | 47,11 ± 15,20 |

S2 Table - Means and standard deviations of the groupings of the data
